# Supplementary material for: MicroProtein-Mediated Recruitment of CONSTANS into a TOPLESS Trimeric Complex Represses Flowering in Arabidopsis
Source: PubMed Central journal article supplement (PMC4807768; doi:10.1371/journal.pgen.1005959), 2016-03-25
Supplement: pgen.1005959.s002.pdf [file pgen.1005959.s002.pdf]

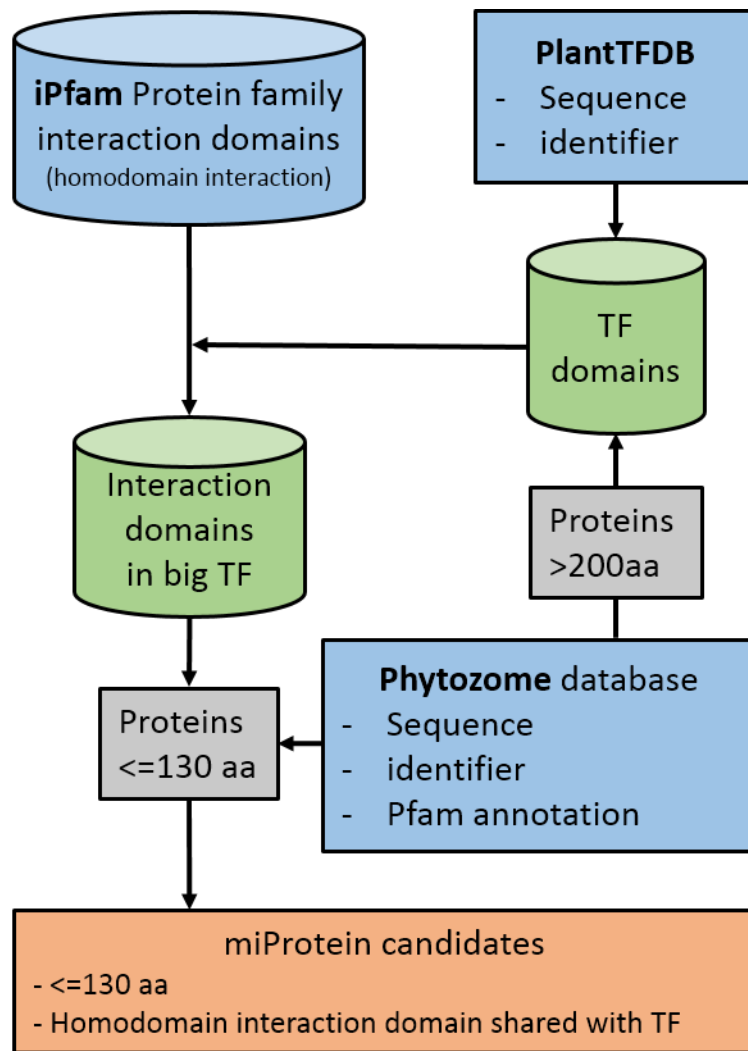

**Suppl. Fig. S1: Flowchart computational approach.** Blue: public available databases; green: resulting Pfam domains; red: microProtein candidates; square: gene identifiers; barrel: Pfam domains.
