# Supplementary material for: MicroProtein-Mediated Recruitment of CONSTANS into a TOPLESS Trimeric Complex Represses Flowering in Arabidopsis
Source: PubMed Central journal article supplement (PMC4807768; doi:10.1371/journal.pgen.1005959), 2016-03-25
Supplement: pgen.1005959.s003.pdf [file pgen.1005959.s003.pdf]

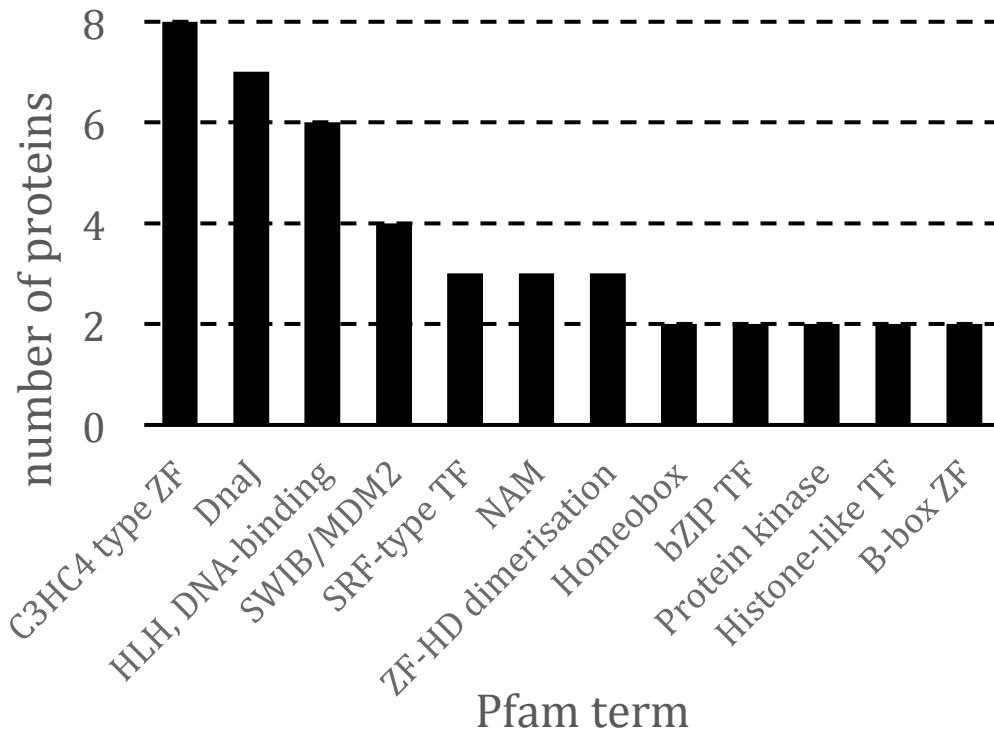

**Suppl. Fig. S2: Number of microProtein candidates with specific Pfam domain domains.** TF: transcription factor, ZF: zinc finger, HLH: Helix-loop-helix.
