# Supplementary material for: MicroProtein-Mediated Recruitment of CONSTANS into a TOPLESS Trimeric Complex Represses Flowering in Arabidopsis
Source: PubMed Central journal article supplement (PMC4807768; doi:10.1371/journal.pgen.1005959), 2016-03-25
Supplement: pgen.1005959.s008.pdf [file pgen.1005959.s008.pdf]

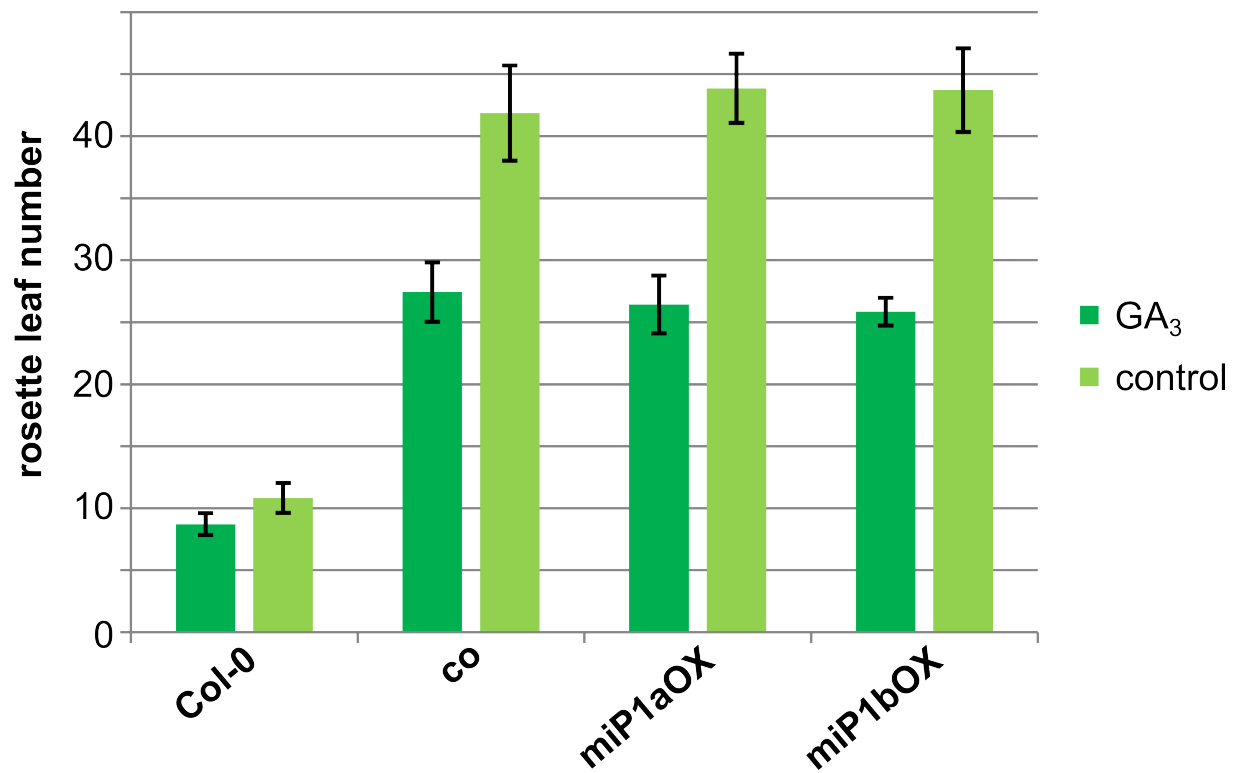

**Supp. Fig. S7. Flowering time of long-day grown plants treated with GA.**

Rosette leaf numbers of Col-0, *co-sail*, *pJAN33::miP1a* and *pJAN33::miP1b* plants grown under long day conditions (16 h light/ 8 h dark) and either treated with 50  $\mu$ M GA<sub>3</sub> or a control solution containing 0.1% EtOH
